# Supplementary material for: Beta-manganese dioxide nanoflowers self-assembled by ultrathin nanoplates with enhanced supercapacitive performance
Source: Royal Society of Chemistry journal article supplement (doi:10.1039/c4ta00155a), 2014-01-01
Supplement: c4ta00155a1.pdf [file c4ta00155a1.pdf]

## Supporting information

### *beta*-manganese dioxide nanoflowers self-assembled by thin nanoplates with enhanced supercapacitive performance

Li-Li Yu <sup>a,\*</sup>, Jun-Jie Zhu <sup>a,c</sup>, Jing-Tai Zhao <sup>b,c\*</sup>

<sup>a</sup> Key Laboratory of Transparent Opto-Functional Inorganic Materials of Chinese Academy of Sciences, Shanghai Institute of Ceramics, 1295 Dingxi Road, Shanghai 200050, P.R. China

<sup>b</sup> School of Material Science and Engineering, Shanghai University, 149 Yanchang Road, Shanghai, 200072, P.R. China

<sup>c</sup> University of Chinese Academy of Sciences, Beijing 100039, P.R. China

Correspond to: [jtzhao@mail.sic.ac.cn](mailto:jtzhao@mail.sic.ac.cn), [lly522@mail.sic.ac.cn](mailto:lly522@mail.sic.ac.cn)

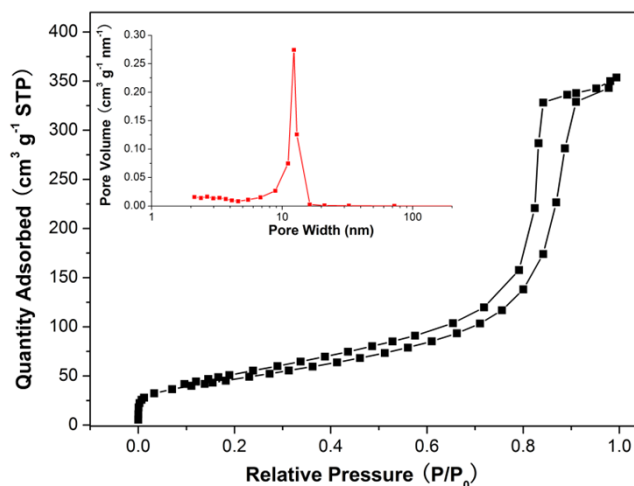

**Fig. S1** Nitrogen adsorption-desorption isotherm plots and corresponding pore size distributions (insets) of samples S<sub>RT</sub>-350

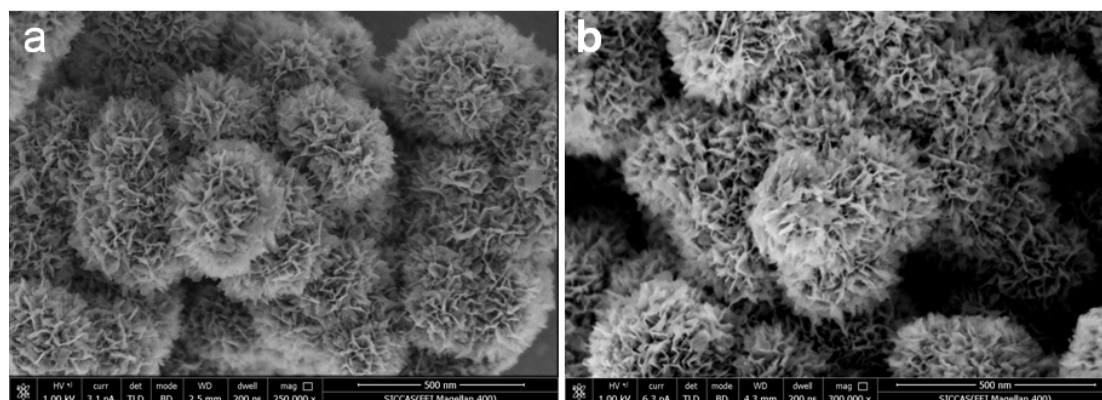

**Fig. S2** SEM images of samples S<sub>RT</sub>-H<sub>2</sub>SO<sub>4</sub> (a) and S<sub>RT</sub>-HNO<sub>3</sub> (b)

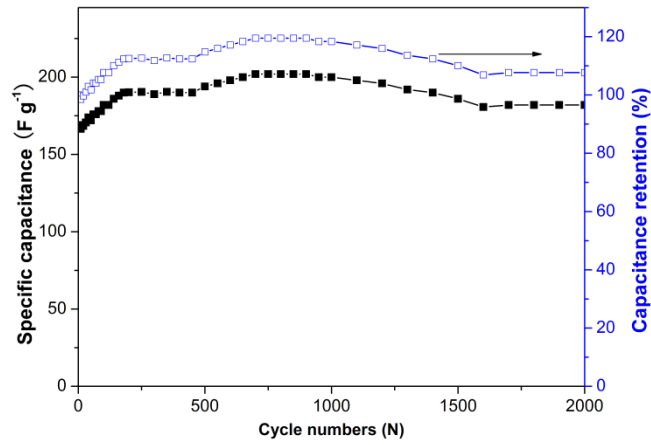

**Fig. S3** Charge/discharge cycling life tests of S<sub>RT</sub>-350 at the current density of 2 A g<sup>-1</sup>

### ***E* and *P* calculation**

Energy density (*E*) and power density (*P*) of the as-prepared porous nanoflowers were calculated from the following equations:

$$E = \frac{1}{2}C(\Delta V)^2$$

$$P = \frac{E}{t}$$

Where *E* (W h Kg<sup>-1</sup>), *C* (F g<sup>-1</sup>),  $\Delta V$  (V), and *P* (W kg<sup>-1</sup>) are energy density specific capacitance, potential window of discharge time, and power density, respectively.
